# Supplementary material
Source: PubMed Central journal article supplement (PMC6072562)
Supplement: NIHMS975967-supplement-1.pdf [file NIHMS975967-supplement-1.pdf]

## SUPPLEMENTARY DATA

**Table S1. List of 114 proteins identified in RT TEX but not UT-TEX<sup>A</sup>**

|               |                   |                   |
|---------------|-------------------|-------------------|
| Cdv3          | Adss              | Actr2             |
| Ptma;Gm6625   | Tes;Gm4985        | Srm               |
| Tceb1         | Tpt1              | Bri3bp            |
| Tardbp        | Gng2              | Tmx3              |
| Eif5a         | Gnb2l1            | Kiaa1467          |
| Epb4.1;Epb41  | Tuba4a;Tuba8      | Sept11;Sept6      |
| Rbmx;Rbmxl1   | Oas1g;Oas1a       | Rangap1           |
| Rbbp7         | Hsd17b12          | Pygb              |
| Nrd1          | Npepps            | Slco4a1           |
| Bcat1         | Scamp3;Tu52       | Eif3l             |
| Tfg           | Farsb             | Eif3c             |
| Otub1         | Aqp1              | Lrrc8c            |
| Qdpr          | Ctsb              | Ciapi1            |
| Sec11a        | Khsrp             | Rab14             |
| Sqstm1        | Adcy7             | Brk1              |
| Snrpa         | Hist1h1d;Hist1h1c | Vcam1             |
| Eif4g1        | Prkcsh            | Rab31             |
| Cse1l         | Tm9sf3            | Taldo1            |
| Alcam         | Naca              | Gps1              |
| Ide           | Ptgs2             | Kars              |
| Atp11a        | Dnajc13           | Eif3e             |
| Psme1         | Rap1a;Gm9392      | Tmem33            |
| Spr           | Kpna4;Kpna3       | Tars              |
| Cyb5;Cyb5a    | Kpna2             | Apmmap            |
| Utrn          | Dbi               | Gsdmdc1           |
| Pld3          | Rpl14             | Alad              |
| Api5          | Dnaja1            | Ipo7              |
| Atp2a2;Atp2a1 | Irgm1;lfggd3      | Tnfrsf23;Tnfrsf22 |
| Vamp8         | Rbbp4             | Slc9a3r2          |
| Cpd           | Cdc37             | Hspe1-rs1;Hspe1   |
| Pdia4         | Bcap31            | Uchl3;Uchl4       |
| Aprt          | Rpn2              | Tcirg1            |
| Gpx1          | Mpp1              | Sigirr            |
| Rps16         | Adh5              | Txnrd1            |
| Gstp1         | Scrib             | Galk1             |
| F3            | Usp14             | Asah1             |
| Gna13         | Slc9a1;Slc9a2     | Gipc1             |
| Psmb8         | Nceh1             | Rpl13a            |

<sup>A</sup> A single protein, Rpl10a, was present in UT-TEX but not RT-TEX

**Table S2. Shared pathways predicted by IPA to be activated or inhibited in RT TEX as compared to UT-TEX**

| <b>ACTIVATED</b>                          | Z-score | P-value     | <b>INHIBITED</b> | Z-score | P-value     |
|-------------------------------------------|---------|-------------|------------------|---------|-------------|
| Thrombin Signaling                        | 2.236   | 0.009       | STAT3 Pathway    | -2      | 0.003954052 |
| Tec Kinase Signaling                      | 2.000   | 0.004       | RhoGDI Signaling | -1.667  | 4.0245E-07  |
| Actin Cytoskeleton Signaling              | 1.941   | 1.57285E-08 | PPAR Signaling   | -1      | 0.009262858 |
| CXCR4 Signaling                           | 1.890   | 0.000663358 |                  |         |             |
| PI3K/AKT Signaling                        | 1.633   | 0.000815054 |                  |         |             |
| Cardiac Hypertrophy Signaling             | 1.633   | 0.00491384  |                  |         |             |
| Integrin Signaling                        | 1.508   | 4.06632E-06 |                  |         |             |
| Regulation of Actin-based Motility by Rho | 1.414   | 1.42092E-06 |                  |         |             |
| Phospholipase C Signaling                 | 1.342   | 8.62323E-06 |                  |         |             |
| PAK Signaling                             | 1.342   | 0.002012238 |                  |         |             |
| Colorectal Cancer Metastasis Signaling    | 1.342   | 0.067922    |                  |         |             |
| IL-8 Signaling                            | 1.265   | 1.02544E-05 |                  |         |             |
| ILK Signaling                             | 1.134   | 6.25828E-05 |                  |         |             |
| Protein Kinase A Signaling                | 1.134   | 0.00789293  |                  |         |             |
| Paxillin Signaling                        | 1       | 6.46918E-05 |                  |         |             |
| Leukocyte Extravasation Signaling         | 1       | 0.000106152 |                  |         |             |
| Glioma Invasiveness Signaling             | 1       | 0.003399518 |                  |         |             |
| ERK/MAPK Signaling                        | 1       | 0.031716478 |                  |         |             |
| Sphingosine-1-phosphate Signaling         | 1       | 0.004543141 |                  |         |             |
| HGF Signaling                             | 1       | 0.003533186 |                  |         |             |
| HMGB1 Signaling                           | 1       | 0.030215453 |                  |         |             |

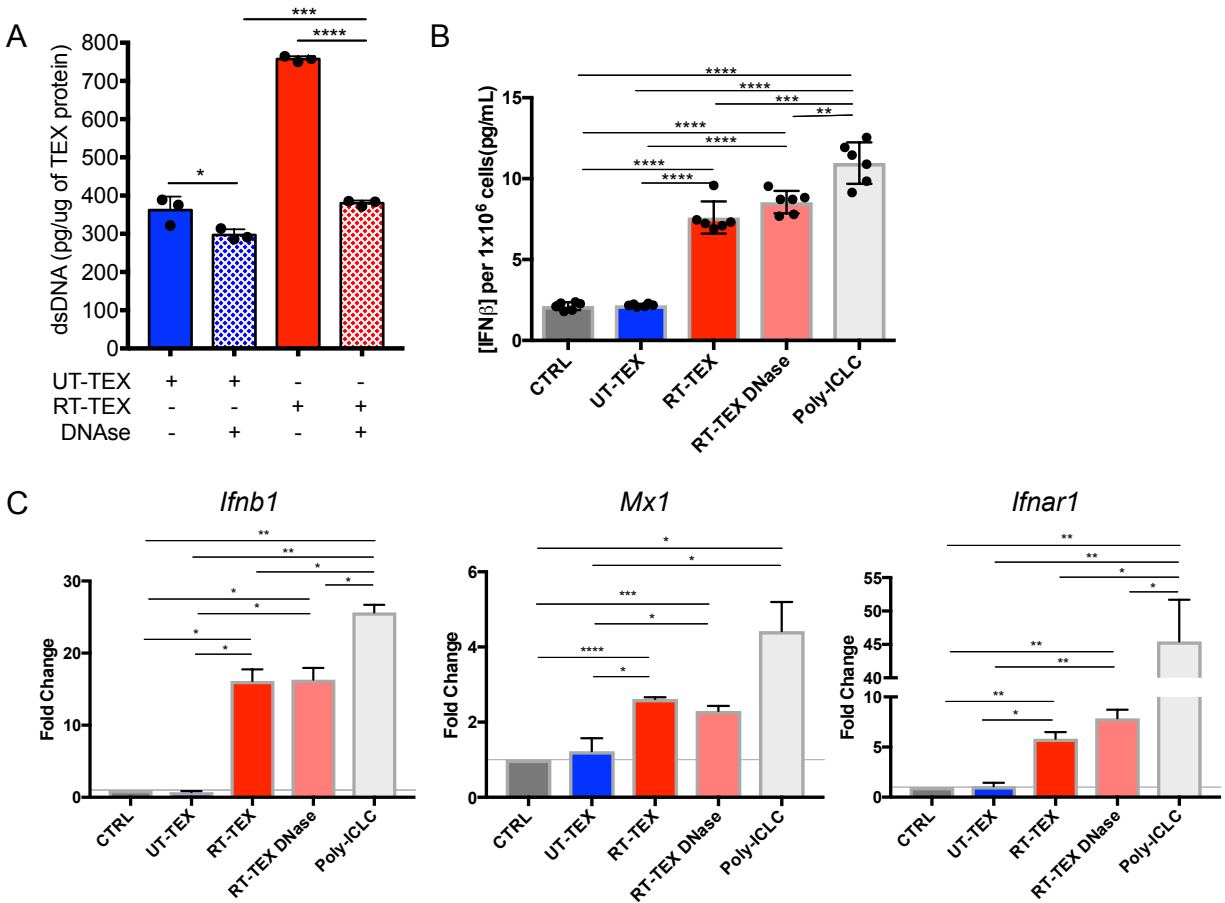

**Figure S1. Externally bound dsDNA is not required for RT-TEX-induced activation of recipient DCs.** (A) To determine the amount of surface-bound dsDNA versus internal dsDNA TEX produced by TSA cells were mock-treated or treated with DNase-I before dsDNA measurement, as indicated. (B, C) CD11c<sup>+</sup> DCs were cultured for 48 h with medium alone (CTRL), with TEX derived from untreated (UT-TEX) or irradiated (RT-TEX) TSA cells, or with the TLR3 agonist poly:ICLC. RT-TEX were pre-treated or not with DNase I, as indicated. (B) IFNβ measured by ELISA in supernatant of DC. (C) Gene expression evaluated by qRT-PCR. Using a Student's two-tailed *t*-test, \*,  $p < 0.05$ ; \*\*,  $p < 0.005$ ; \*\*\*,  $p < 0.0005$ ; \*\*\*\*,  $p < 0.00005$ .

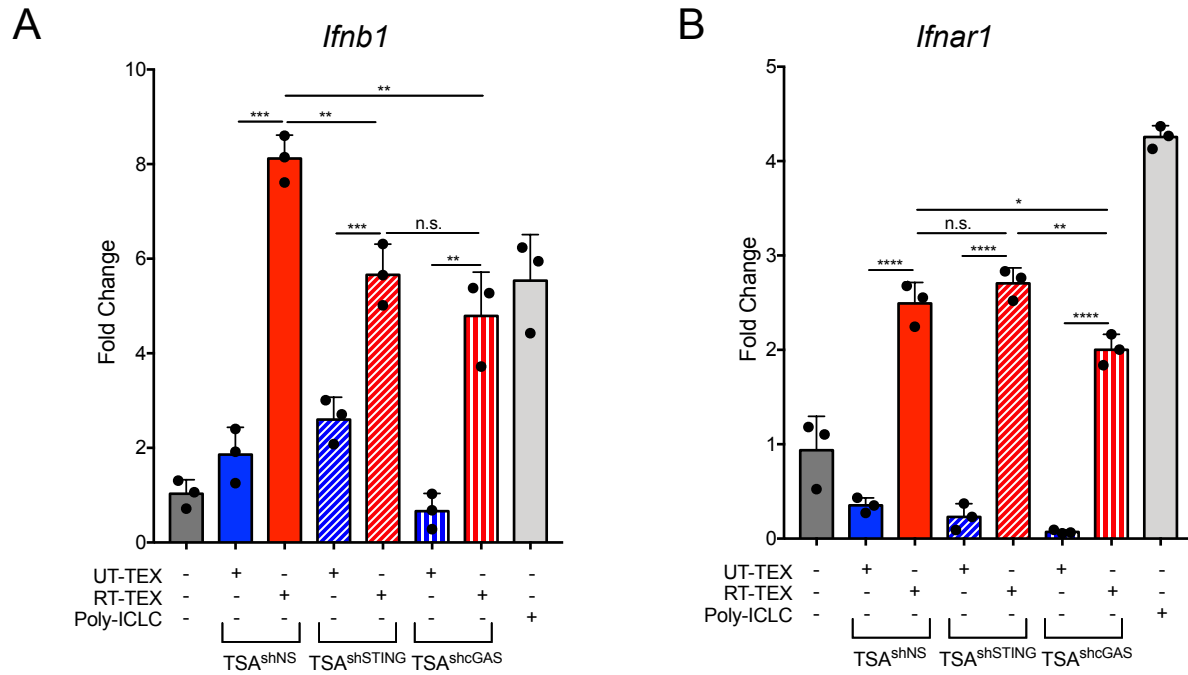

**Figure S2. Down-regulation of cGAS and STING in TSA cells does not impair RT-TEX-induced activation of recipient DCs.** (A, B) CD11c<sup>+</sup> DCs were cultured for 48 h with TEX derived from untreated and RT-treated TSA<sup>shNS</sup>, TSA<sup>shSTING</sup>, TSA<sup>shcGAS</sup> cells, or with the TLR3 agonist poly:ICLC, as indicated. Expression of *Ifnb* (A) and *Ifnar* (B) was analyzed by qRT-PCR. Using a Student's two-tailed *t*-test, n.s., not significant; \*,  $p < 0.05$ ; \*\*,  $p < 0.005$ ; \*\*\*,  $p < 0.0005$ ; \*\*\*\*,  $p < 0.00005$ .
